# Supplementary material for: Perchlorate ion doped polypyrrole coated ZnS sphere composites as a sodium-ion battery anode with superior rate capability enhanced by pseudocapacitance
Source: Royal Society of Chemistry journal article supplement (doi:10.1039/c7ra07901j), 2017-01-01
Supplement: c7ra07901j1.pdf [file c7ra07901j1.pdf]

Electronic Supplementary Information

**Perchlorate ions doped polypyrrole coated ZnS spheres composite as sodium-ion battery anode with superior rate capability enhanced by pseudocapacitance**

**Tianyi Hou,<sup>a</sup> Guojie Tang,<sup>a</sup> Xiaohong Sun,<sup>\*a</sup> Shu Cai,<sup>a</sup> Chunming Zheng<sup>\*b</sup> and Wenbin Hu<sup>a</sup>**

*<sup>a</sup>School of Materials Science and Engineering, Key Laboratory of Advanced Ceramics and Machining Technology of Ministry of Education, Tianjin University, Tianjin 300072, PR China*

*<sup>b</sup>State Key Laboratory of Hollow-fiber Membrane Materials and Membrane Processes, School of Environmental and Chemical Engineering, Tianjin Polytechnic University, Tianjin 300387, PR China*

\*corresponding authors:

E-mail: [sunxh@tju.edu.cn](mailto:sunxh@tju.edu.cn) (X. Sun), TEL/FAX: +86-22-85356661;

E-mail: [zhengchunming@tjpu.edu.cn](mailto:zhengchunming@tjpu.edu.cn) (C. Zheng), TEL/FAX: +86-22-83955661

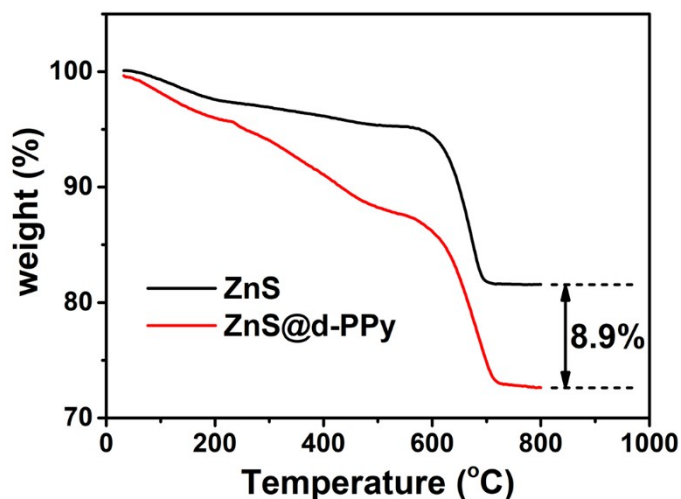

**Fig. S1.** TGA curves for ZnS and ZnS@d-PPy from room temperature to 800°C measured with a heating rate of 10°C min<sup>-1</sup> under air atmosphere.

With temperature increasing, the final product of combustion is ZnO for both ZnS and ZnS@d-PPy. Two steps of weight losses in ZnS can be observed and assigned to the evaporation of absorbed water (before 300°C) and the oxidation of the ZnS (between 600 and 700°C). For ZnS@d-PPy, mass losses before 300°C are composed of the evaporation of adsorbed water for both ZnS and d-PPy.<sup>1-3</sup> The thermal decomposition of d-PPy can range in temperature from 300°C to 800°C and a rapid decrease in weight between 600 and 700°C is mainly assigned to the oxidation of ZnS in ZnS@d-PPy. Therefore, the content of d-PPy in ZnS@d-PPy can be obtained by weighting the final weights of ZnS and ZnS@d-PPy, which is about 8.9 wt%, as shown in Fig. S1.

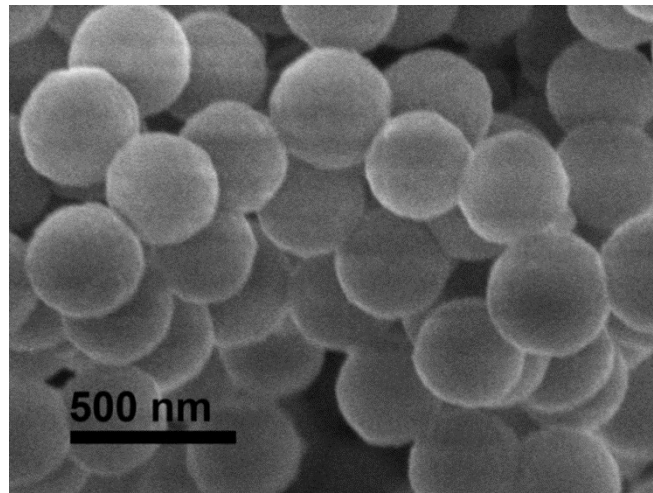

**Fig. S2.** SEM image of ZnS@PPy.

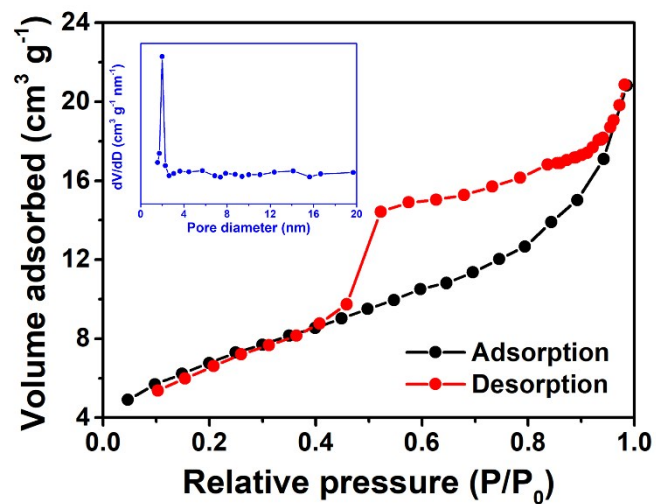

**Fig. S3.** Nitrogen sorption isotherm of ZnS. Inset of it is the pore size distribution curve.

Nitrogen sorption analysis of ZnS spheres shows type-IV curve and the mesopores are generated from nanoparticles stacking. The pore size distribution center at about 2 nm measured using Barrett-Joyner-Halenda (BJH) model. The Brunauer-Emmett-Teller (BET) surface area is calculated to be 24 m<sup>2</sup> g<sup>-1</sup>.

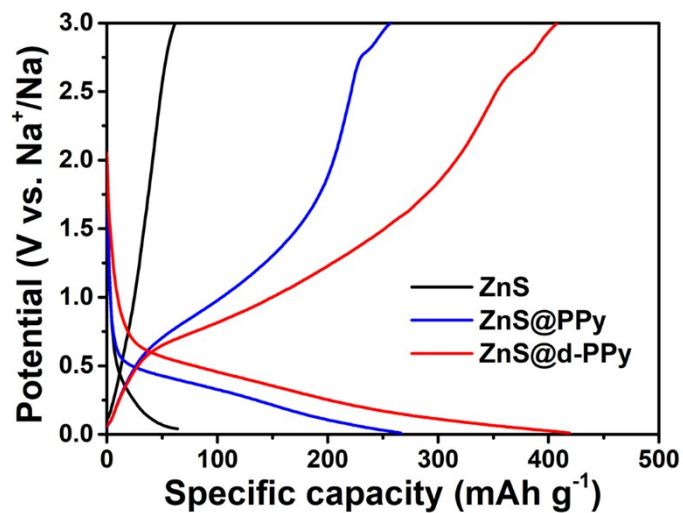

**Fig. S4.** Discharge/charge voltage profiles of ZnS, ZnS@PPy and ZnS@d-PPy between 0.01 and 3 V at 100 mA g<sup>-1</sup> at the 30th cycle.

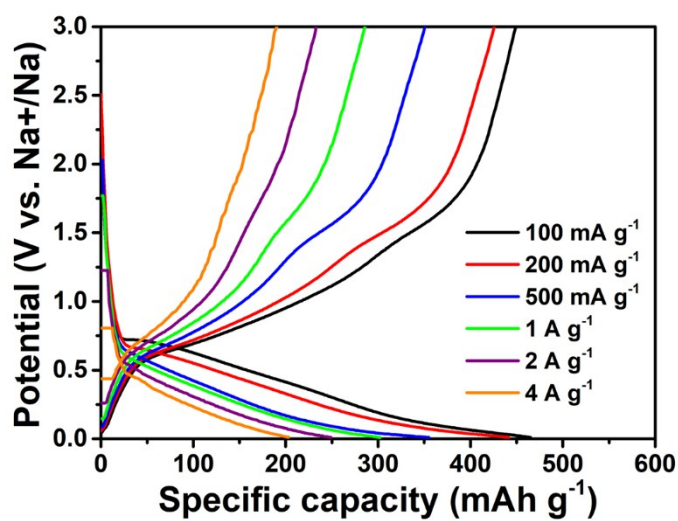

**Fig. S5.** Discharge/charge voltage profiles of ZnS@d-PPy between 0.01 and 3 V at different rates.

**Table S1.** Comparison of the results in this study with previous reported performance of the ZnS-based SIB anodes.

| Sample    | Rate capability                                                                                                                                                                                                                                                                                                                           | Cycling performance                                               | reference        |
|-----------|-------------------------------------------------------------------------------------------------------------------------------------------------------------------------------------------------------------------------------------------------------------------------------------------------------------------------------------------|-------------------------------------------------------------------|------------------|
| ZnS-RGO   | 610 mAh g <sup>-1</sup> at 100 mA g <sup>-1</sup> ;<br>472 mAh g <sup>-1</sup> at 250 mA g <sup>-1</sup> ;<br>417 mAh g <sup>-1</sup> at 500 mA g <sup>-1</sup> ;<br>357 mAh g <sup>-1</sup> at 1000 mA g <sup>-1</sup> ;                                                                                                                 | 481 mAh g <sup>-1</sup> at 100 mA g <sup>-1</sup><br>(50 cycles)  | 1                |
| ZnS@NC    | 480 mAh g <sup>-1</sup> at 100 mA g <sup>-1</sup> ;<br>450 mAh g <sup>-1</sup> at 200 mA g <sup>-1</sup> ;<br>410 mAh g <sup>-1</sup> at 500 mA g <sup>-1</sup> ;<br>360 mAh g <sup>-1</sup> at 1000 mA g <sup>-1</sup> ;                                                                                                                 | 460 mAh g <sup>-1</sup> at 200 mA g <sup>-1</sup><br>(80 cycles)  | 2                |
| ZnS       | ~850 mAh g <sup>-1</sup> at 20 mA g <sup>-1</sup> ;<br>~670 mAh g <sup>-1</sup> at 40 mA g <sup>-1</sup> ;<br>~600 mAh g <sup>-1</sup> at 80 mA g <sup>-1</sup> ;<br>~560 mAh g <sup>-1</sup> at 160 mA g <sup>-1</sup> ;<br>~500 mAh g <sup>-1</sup> at 320 mA g <sup>-1</sup> ;<br>~460 mAh g <sup>-1</sup> at 640 mA g <sup>-1</sup> ; | 465 mAh g <sup>-1</sup> at 320 mA g <sup>-1</sup><br>(100 cycles) | 4                |
| ZnS@d-PPy | 465 mAh g <sup>-1</sup> at 100 mA g <sup>-1</sup> ;<br>441 mAh g <sup>-1</sup> at 200 mA g <sup>-1</sup> ;<br>355 mAh g <sup>-1</sup> at 500 mA g <sup>-1</sup> ;<br>302 mAh g <sup>-1</sup> at 1000 mA g <sup>-1</sup> ;<br>249 mAh g <sup>-1</sup> at 2000 mA g <sup>-1</sup> ;<br>203 mAh g <sup>-1</sup> at 4000 mA g <sup>-1</sup> ; | 419 mAh g <sup>-1</sup> at 100 mA g <sup>-1</sup><br>(30 cycles)  | <b>This work</b> |

## References

- 1 J. Li, Y. Fu, X. Shi, Z. Xu and Z. Zhang, *Chem. Eur. J.*, 2017, **23**, 157-166.
- 2 W. Qin, D. Li, X. Zhang, D. Yan, B. Hu and L. Pan, *Electrochim. Acta*, 2016, **191**, 435-443.
- 3 J. Yuan, C. Chen, Y. Hao, X. Zhang, B. Zou, R. Agrawal, C. Wang, H. Yu, X. Zhu, Y. Yu, Z. Xiong, Y. Luo, H. Li and Y. Xie, *J. Alloys Compd.*, 2017, **691**, 34-39.
- 4 D. Su, K. Kretschmer and G. Wang, *Adv. Energy Mater.*, 2016, **6**, 1501785.
